# Supplementary material
Source: Springer Nature journal article supplement (https://www.springermedizin.de/resource/supplementary/12876_2013_1122_MOESM1_ESM.pdf/9438512)
Supplement: MOESM1 [file 9438512]

Paneth cells / 10 crypts

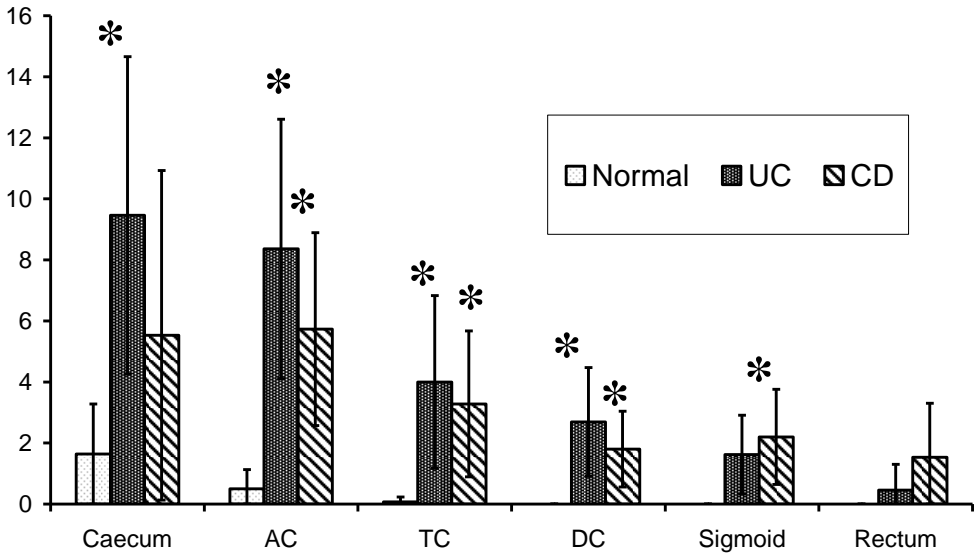

Site (AC=ascending colon, TC=transverse colon, DC=descending colon)

\* Significantly greater than controls,  $P < 0.05$  (see text)
